# Supplementary material for: Scarless Removal of Large Resistance Island AbaR Results in Antibiotic Susceptibility and Increased Natural Transformability in Acinetobacter baumannii
Source: PubMed Central journal article supplement (PMC7508600; doi:10.1128/aac.00951-20), 2020-09-21
Supplement: AAC.00951-20-s0001.pdf [file AAC.00951-20-s0001.pdf]

*Title:* Scarless removal of large resistance island AbaR results in antibiotic susceptibility and increased natural transformability in *Acinetobacter baumannii*.

*Authors:* Anne-Sophie Godeux<sup>a,b</sup>, Elin Svedholm<sup>a</sup>, Agnese Lupo<sup>c</sup>, Marisa Haenni<sup>c</sup>, Samuel Venner<sup>d</sup>, Maria-Halima Laaberki<sup>a,b,#,\*</sup>, Xavier Charpentier<sup>a,#</sup>.

a. CIRI, Centre International de Recherche en Infectiologie, Univ Lyon, Inserm, U1111, Université Claude Bernard Lyon 1, CNRS, UMR5308, ENS de Lyon, 69100, Villeurbanne, France

b. Université de Lyon, VetAgro Sup, 69280 Marcy l'Etoile, France.

c. Unité Antibiorésistance et Virulence Bactériennes, Université de Lyon - ANSES Site de Lyon, Lyon, France

d. Laboratoire de Biométrie et Biologie Evolutive, CNRS UMR5558, Université Claude Bernard Lyon 1, Villeurbanne, France

# Contributed equally

\* Correspondence to Maria-Halima Laaberki, maria-halima.laaberki@vetagro-sup.fr

## SUPPLEMENTAL MATERIAL

### **Table S1: primers used in this study**

### **Detailed protocol of chimeric PCR for mutation in *A. baumannii***

1

## 2 SUPPLEMENTARY MATERIALS

3 **Table S1: primers used in this study**

4

| Genetic construct                                     | Name*          | Sequence 5' to 3'                                         | Template; Annealing site                                                                                                      |
|-------------------------------------------------------|----------------|-----------------------------------------------------------|-------------------------------------------------------------------------------------------------------------------------------|
| Chromosomal modifications using overlap extension PCR |                |                                                           |                                                                                                                               |
| <i>comM::sacB_aacC4</i>                               | mlo-2 (P1)     | GCCTGGAATTGTCATCAACAGAACC                                 | AB5075 and AYE genomic DNA; <i>amt</i> gene = 2kb upstream of the <i>comM</i> gene                                            |
|                                                       | mlo-3 (P2)     | <b>GGCCCAATTCGCCCTATAGTGAGTCG</b> ATTGCTGATGCTGTATGGTGGGG | AB5075 and AYE genomic DNA; 5' <i>comM</i> gene and adapter sequence reverse-complement to primer mazF-K7-F (bold and orange) |
|                                                       | mlo-4 (P3)     | <b>GGGTTTGCTCGGGTCGGTGGCATATG</b> CAATGAATCCTTGTCCATGTGGG | AB5075 and AYE genomic DNA; 3' <i>comM</i> gene and adapter sequence reverse-complement to primer mlo-1 (bold and blue)       |
|                                                       | mlo-5 (P4)     | GCATGTCTTGCTGTGCGTGTGGC                                   | AB5075 and AYE genomic DNA; <i>ABUW_3681</i> gene = 2kb downstream of the <i>comM</i> gene                                    |
|                                                       | mazF-K7-F (P5) | <b>CGACTCACTATAGGGCGAATTGGGCCGCTTCCAGTCGGGAAACCTG</b>     | pMHL-2 (Godeux et al., 2018); upstream <i>sacB</i> gene and adapter sequence (bold)                                           |
|                                                       | mlo-1 (P6)     | <b>CATATGCCACCGACCCGAGCAAACCC</b> CGCCAGGGTTTTCCAGTCACGAC | pMHL-2 (Godeux et al., 2018); downstream <i>aacC4</i> gene and adapter sequence (bold)                                        |
| $\Delta$ AbaR                                         | mlo-6 (P7)     | <u>ACCGCCCCCAACCAGTGCAATTG</u>                            | AB5075 and AYE genomic DNA ; <i>comM</i> at AbaR insertion locus (annealing with mlo-7 is underlined)                         |
|                                                       | mlo-7 (P8)     | <u>CAATTGCACTGGTTGGGGCGGTTACACCCCCAAACCGGGTCAAATTAC</u>   | AB5075 and AYE genomic DNA ; <i>comM</i> at AbaR insertion locus (annealing with mlo-6 is underlined)                         |
| $\Delta$ <i>comM</i>                                  | asg-75 (P7')   | <u>AATTTCTAGTGACGCCG</u>                                  | AB5075 and AYE genomic DNA; 5' <i>comM</i> gene (annealing with asg-76 is underlined)                                         |

|                                                                                       |              |                                             |                                                                                       |
|---------------------------------------------------------------------------------------|--------------|---------------------------------------------|---------------------------------------------------------------------------------------|
|                                                                                       | asg-76 (P8') | <u>CGGCGTGCACTAGAAATTCCAACCGGGTGAAATTAC</u> | AB5075 and AYE genomic DNA; 3' <i>comM</i> gene (annealing with asg-75 is underlined) |
| Primers for control using colony PCR and for sequencing of the <i>comM</i> locus      |              |                                             |                                                                                       |
|                                                                                       | mlo-80       | CGGATCTTCGATGCTGGC                          | AbaR1 from AYE strain                                                                 |
|                                                                                       | mlo-84       | GCAACGATGTTACGCAGC                          | AbaR1 from AYE strain                                                                 |
|                                                                                       | comM-For     | CCACAATGGAACAAGAAGATGTCT                    | 5' of the <i>comM</i> gene                                                            |
|                                                                                       | comM-Rev     | TTAAGAGTGATTACCTCGATAAGA                    | 3' of the <i>comM</i> gene                                                            |
|                                                                                       | mlo-29       | TCATGAGCTCAGCCAATCGACTGG                    | End of ApraR cassette                                                                 |
|                                                                                       | asg-61       | CCACAGAATGATGTCACG                          | 5' of the <i>aacC4</i> gene                                                           |
| PCR product carrying the <i>rpoB</i> mutation as substrate for natural transformation |              |                                             |                                                                                       |
|                                                                                       | mlo-104      | AAGATATCGGTCTCCAAGC                         | AB5075 genomic DNA; <i>rpoB</i> gene                                                  |
|                                                                                       | mlo-105      | AGTACGGCCTTCAACGTCAT                        | AB5075 genomic DNA; <i>rpoB</i> gene                                                  |

5 \*as referred in Fig.1

6

7

8

9

10 **Detailed protocol of chimeric PCR for mutation in *A. baumannii***

11 Two rounds of PCR are required to produce chimeric PCR products: a first PCR to add overlapping extensions to the DNA  
12 fragments and a second to assemble the first DNA fragments.

13 **1. First PCR (Overlapping extension PCR)**

14 *PCR mix:*

|    |                                 |               |
|----|---------------------------------|---------------|
| 15 | PCR mix                         | 25µL reaction |
| 16 | DNA template [20ng to 100ng/µL] | 1µL           |
| 17 | Primer F 10µM                   | 0.5µL         |
| 18 | Primer R 10µM                   | 0.5µL         |
| 19 | PrimeSTAR premix (Takara)       | 12.5µL        |
| 20 | H2O qsp 25µL                    | 10.5µL        |

21

22 *PCR cycling conditions :*

|    |                                   |           |
|----|-----------------------------------|-----------|
| 23 | Initial denaturation 98°C- 2 min. |           |
| 24 | Denaturation 98°C - 20 sec.       | 30 cycles |
| 25 | Annealing 55°C – 20 sec.          |           |
| 26 | Extension 72°C – 40 min.          |           |
| 27 | Final extension 72°C – 5 min.     |           |

28

29 Then proceed to PCR purification after migration of the whole PCR reactions in buffered agarose gel stained with SYBR Safe  
30 (Thermofisher). The bands at the correct size are excised from the gel above a blue-light transilluminator (this is critical) and  
31 DNA extracted following instructions of the manufacturer (Omega Bio-Tek/VWR).

32 Alternatively, the PCR products are purified using magnetic beads following manufacturer's protocol (Ampure XP /Beckman  
33 Coulter) after a direct DpnI digestion of the genomic DNA in the PCR mix.

34 The purified PCR products are then analyzed (5 $\mu$ L) on agarose gel stained with ethidium bromide. Concentration should be at  
35 least 30ng/ $\mu$ L for each PCR products and a single band obtained.

36

## 37 **2. Second PCR (assembly PCR)**

38 This second round of PCR assembles the three PCR products with a ratio of 1/2/1 for PCR[P1 + P2] / PCR[P5 + P6] / PCR[P3  
39 + P4] in the PCR mix using the P1 (forward primer) and P4 (reverse primer).

40 *PCR mix:[DNA concentration for example]*

| 41 | PCR Assembly                  | 50 $\mu$ L reaction |
|----|-------------------------------|---------------------|
| 42 | PCR[P1 + P2] [100ng/ $\mu$ L] | 1                   |
| 43 | PCR[P5 + P6] [30ng/ $\mu$ L]  | 6                   |
| 44 | PCR[P3 + P4] [100ng/ $\mu$ L] | 1                   |
| 45 | Primer P1 10 $\mu$ M          | 1                   |
| 46 | Primer P4 10 $\mu$ M          | 1                   |
| 47 | PrimeStar premix (Takara)     | 25                  |
| 48 | H2O                           | 15                  |

49 Note that the total amount of PCR products is close to 500ng for a 50 $\mu$ L reaction, this can be up to 800ng-1 $\mu$ g, without  
50 exceeding a total of 10 $\mu$ L of first PCR products for a 50 $\mu$ L PCR reaction.

51

52 *PCR cycling conditions :*

|    |                               |           |
|----|-------------------------------|-----------|
| 53 | Initial denaturation 98°C- 2' |           |
| 54 | Denaturation 98°C -20"        | 30 cycles |
| 55 | Annealing 55°C – 20"          |           |
| 56 | Extension 72°C – 1' 30"       |           |
| 57 | Final extension 72°C – 5'     |           |

58 Then proceed to PCR purification either after migration in buffered agarose gel stained using SYBR Safe (Thermofisher)  
59 followed by gel extraction (Omega Bio-Tek/VWR) or alternatively using Ampure XP beads (Beckman Coulter).
